# Supplementary material for: Determination of the Dominating Coalescence Pathways in Double Emulsion Formulations by Use of Microfluidic Emulsions
Source: MDPI journal article supplement (doi:10.3390/pr11010234), 2023-01-11
Supplement: s1 [file s1]

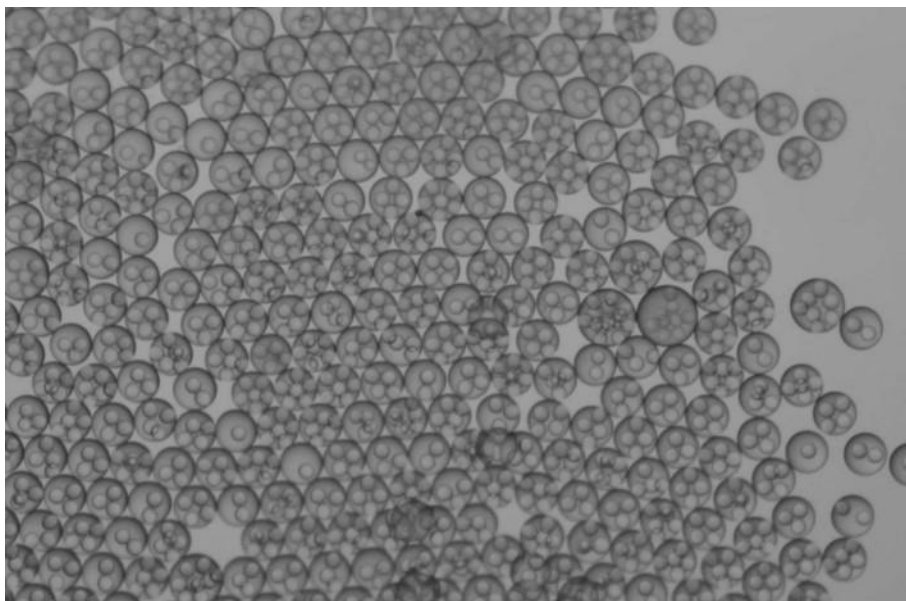

Figure S1: Double emulsion stabilized with Brij C10 after 20 min storage time.

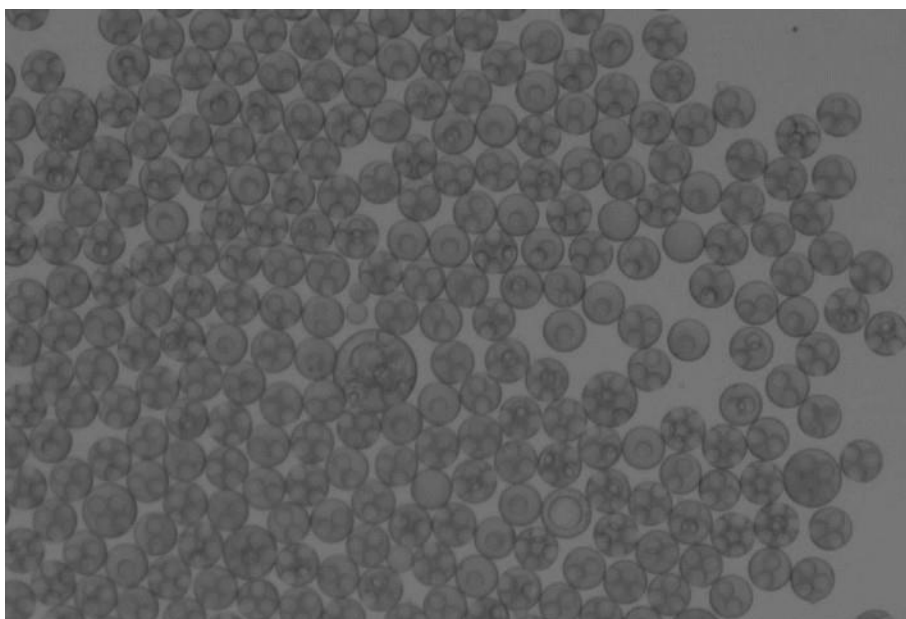

Figure S2: Double emulsion stabilized with Brij C10 after 80 min storage time.

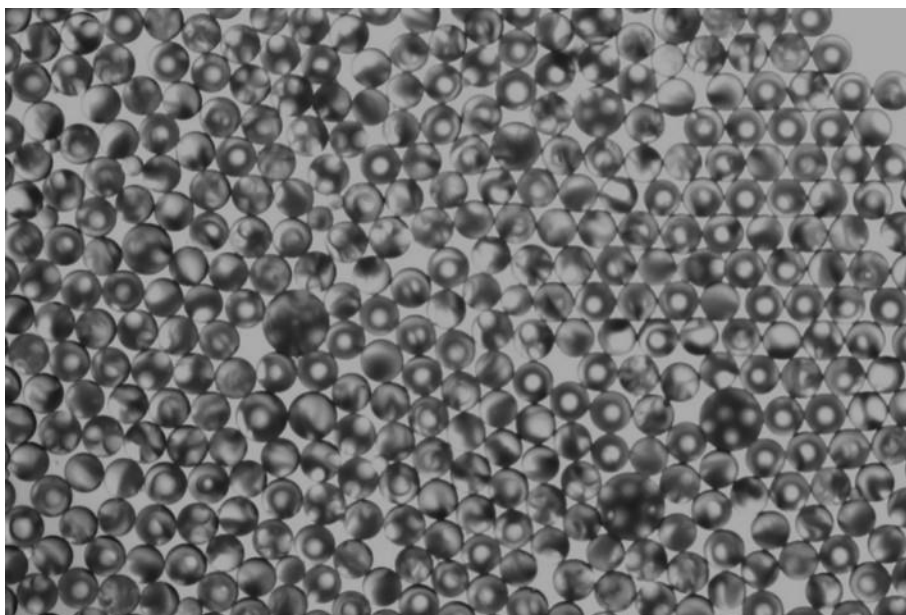

Figure S3: Double emulsion stabilized with Brij C10 after one day storage time.

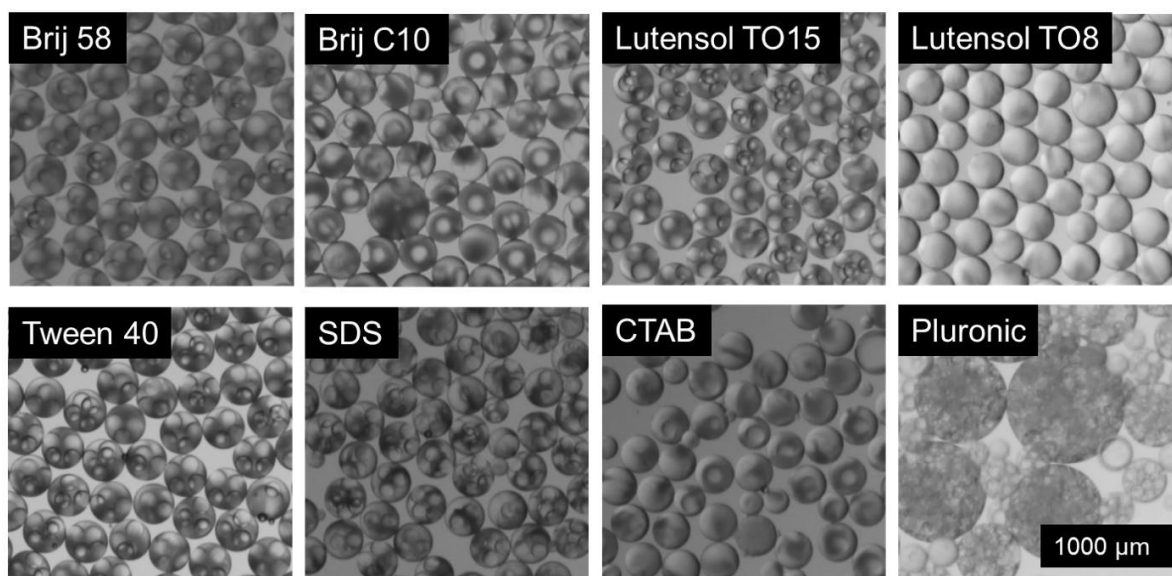

Figure S4: Photos of double emulsion droplets directly after microfluidic break-up and after one day of storage in their respective surfactant solutions.
